# Supplementary material for: Curcumin-based sulfenic acid as a light switch for the binding of biothiols
Source: Royal Society of Chemistry journal article supplement (doi:10.1039/d0nj04834h), 2020-01-01
Supplement: d0nj04834h1.pdf [file d0nj04834h1.pdf]

## SUPPORTING INFORMATION

# Curcumin-based Sulfenic Acid as light-switch for the Binding of Biothiols

*Anna Barattucci,\* Tania M. G. Salerno, Franz H. Kohnke, Teresa Papalia, Fausto Puntoriero and  
Paola Bonaccorsi\**

Dipartimento di Scienze Chimiche, Biologiche, Farmaceutiche ed Ambientali, Università degli Studi  
di Messina, viale F. Stagno d'Alcontres, 31, 98166 Messina

[abarattucci@unime.it](mailto:abarattucci@unime.it)

[pbonaccorsi@unime.it](mailto:pbonaccorsi@unime.it)

### Contents

|                                                                            |       |
|----------------------------------------------------------------------------|-------|
| <sup>1</sup> H and <sup>13</sup> C NMR spectra of compound <b>3</b> .....  | S2    |
| <sup>1</sup> H and <sup>13</sup> C NMR spectra of compound <b>4</b> .....  | S3    |
| <sup>1</sup> H and <sup>13</sup> C NMR spectra of compound <b>6</b> .....  | S4-S5 |
| <sup>1</sup> H and <sup>13</sup> C NMR spectra of compound <b>7</b> .....  | S6    |
| <sup>1</sup> H and <sup>13</sup> C NMR spectra of compound <b>8</b> .....  | S7    |
| <sup>1</sup> H and <sup>13</sup> C NMR spectra of compound <b>10</b> ..... | S8    |
| <sup>1</sup> H spectrum of compound <b>11</b> .....                        | S9    |

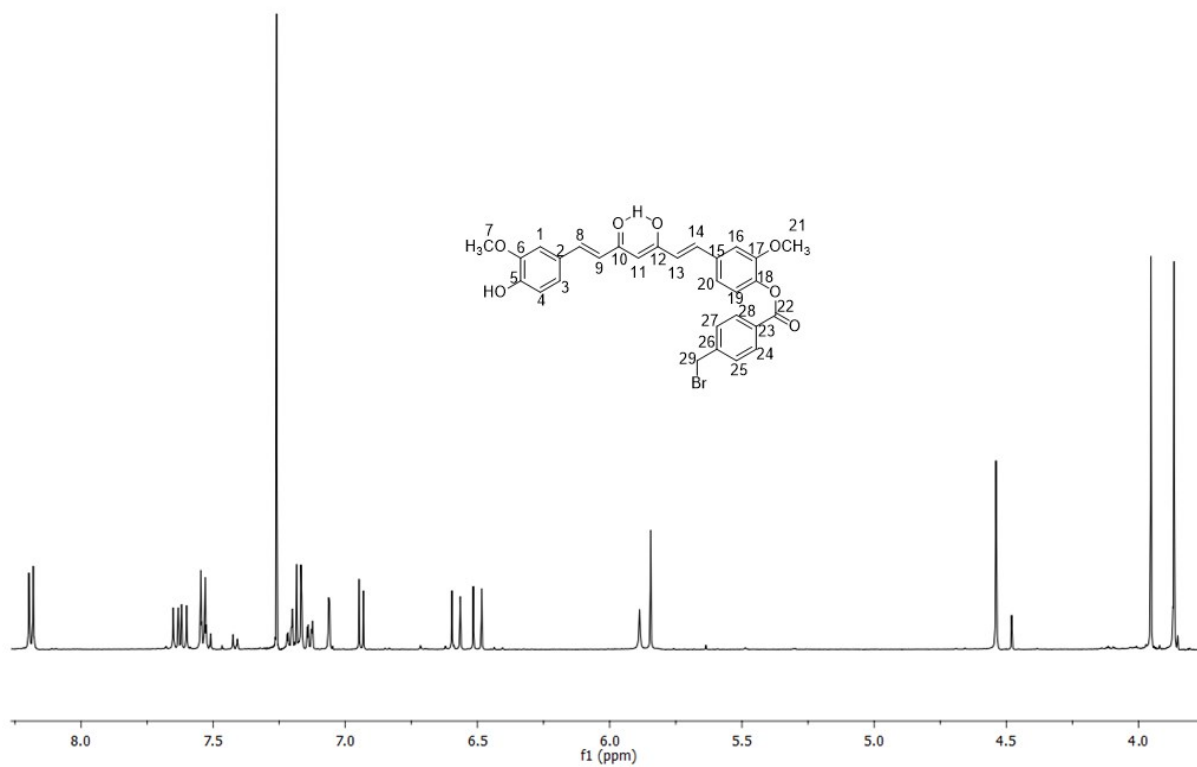

Figure S1.  $^1\text{H}$  NMR spectrum of compound 3 (500 MHz,  $\text{CDCl}_3$ , 25 °C)

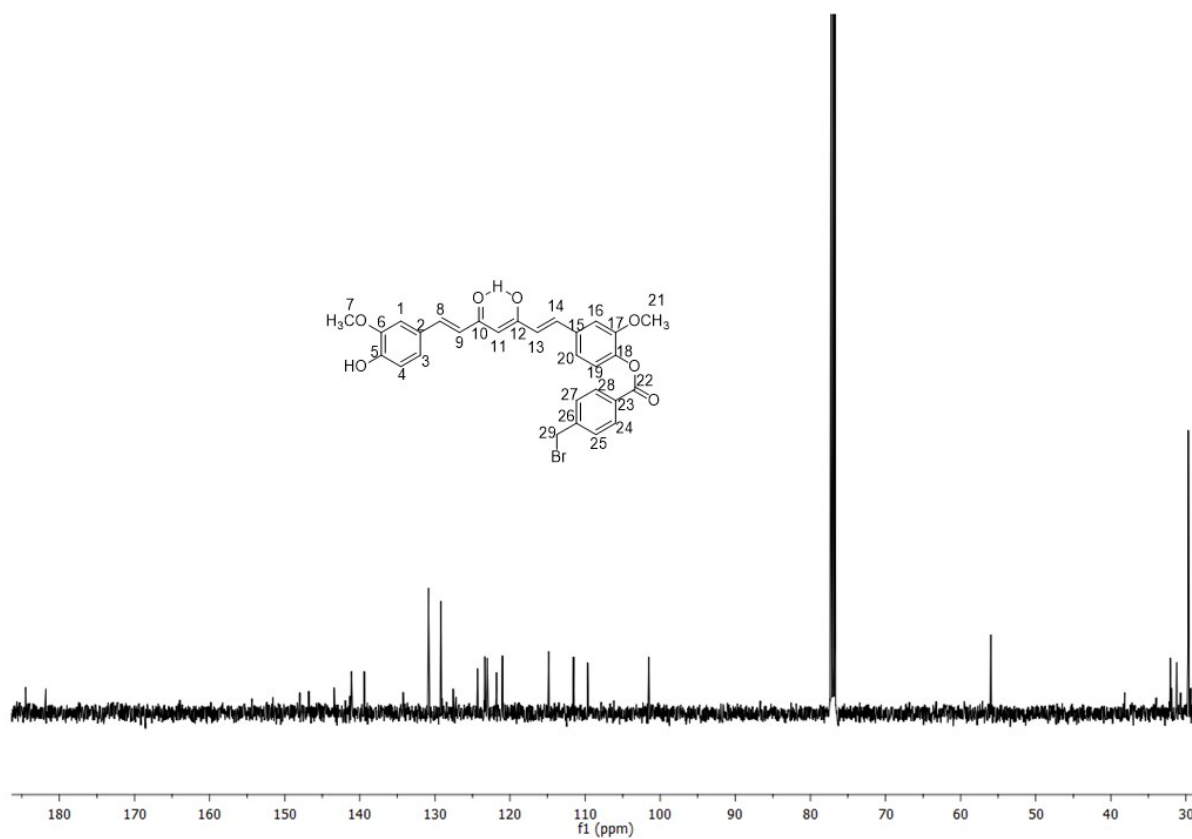

Figure S2.  $^{13}\text{C}$  NMR spectrum of compound 3 (500 MHz,  $\text{CDCl}_3$ , 25 °C)

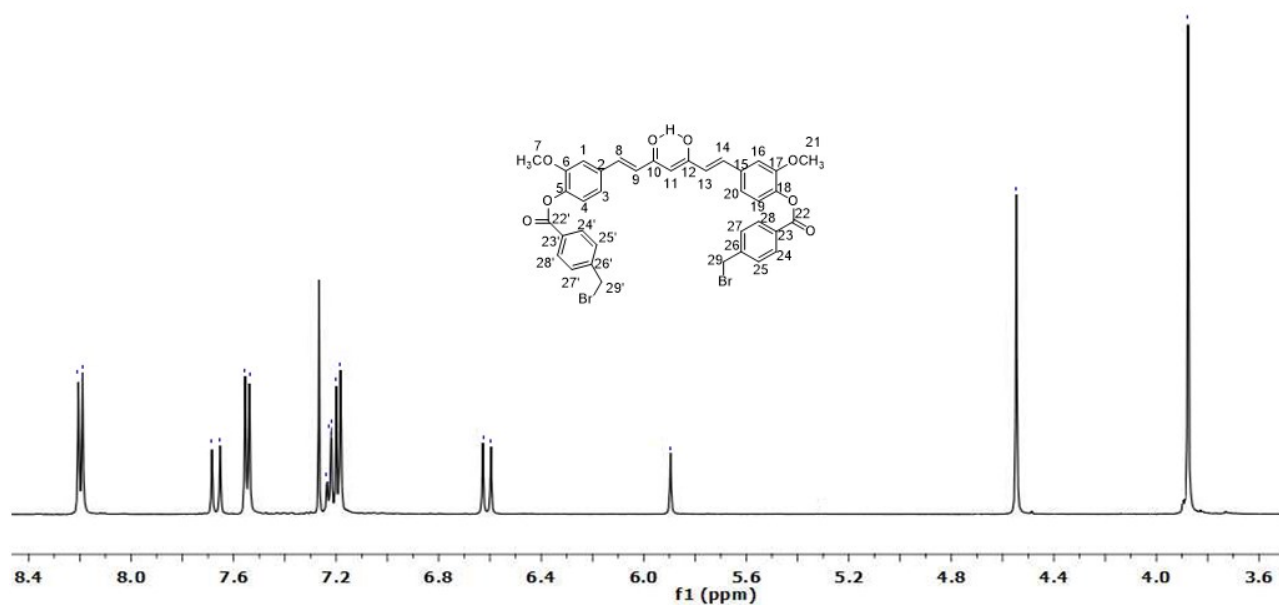

Figure S3. <sup>1</sup>H spectrum of compound 4 (500 MHz, CDCl<sub>3</sub>, 25 °C)

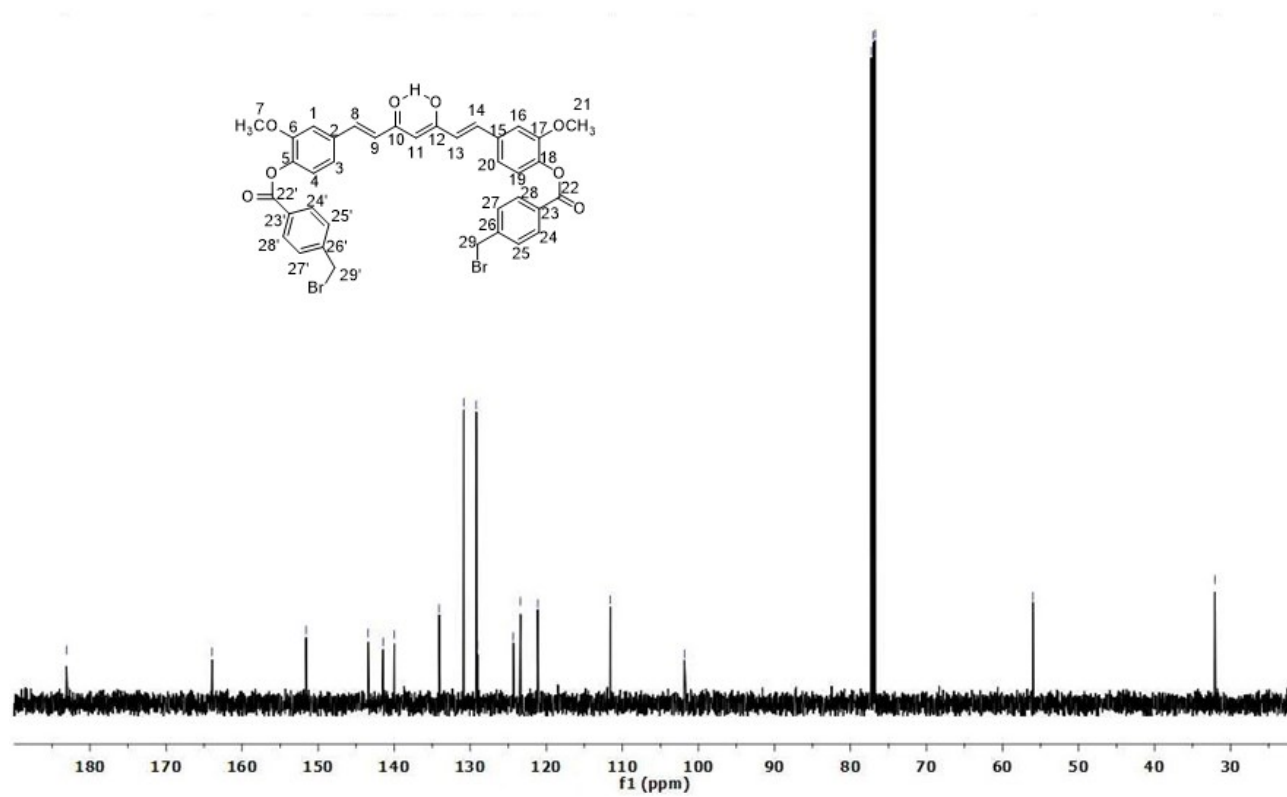

Figure S4. <sup>13</sup>C NMR spectrum of compound 4 (500 MHz, CDCl<sub>3</sub>, 25 °C)

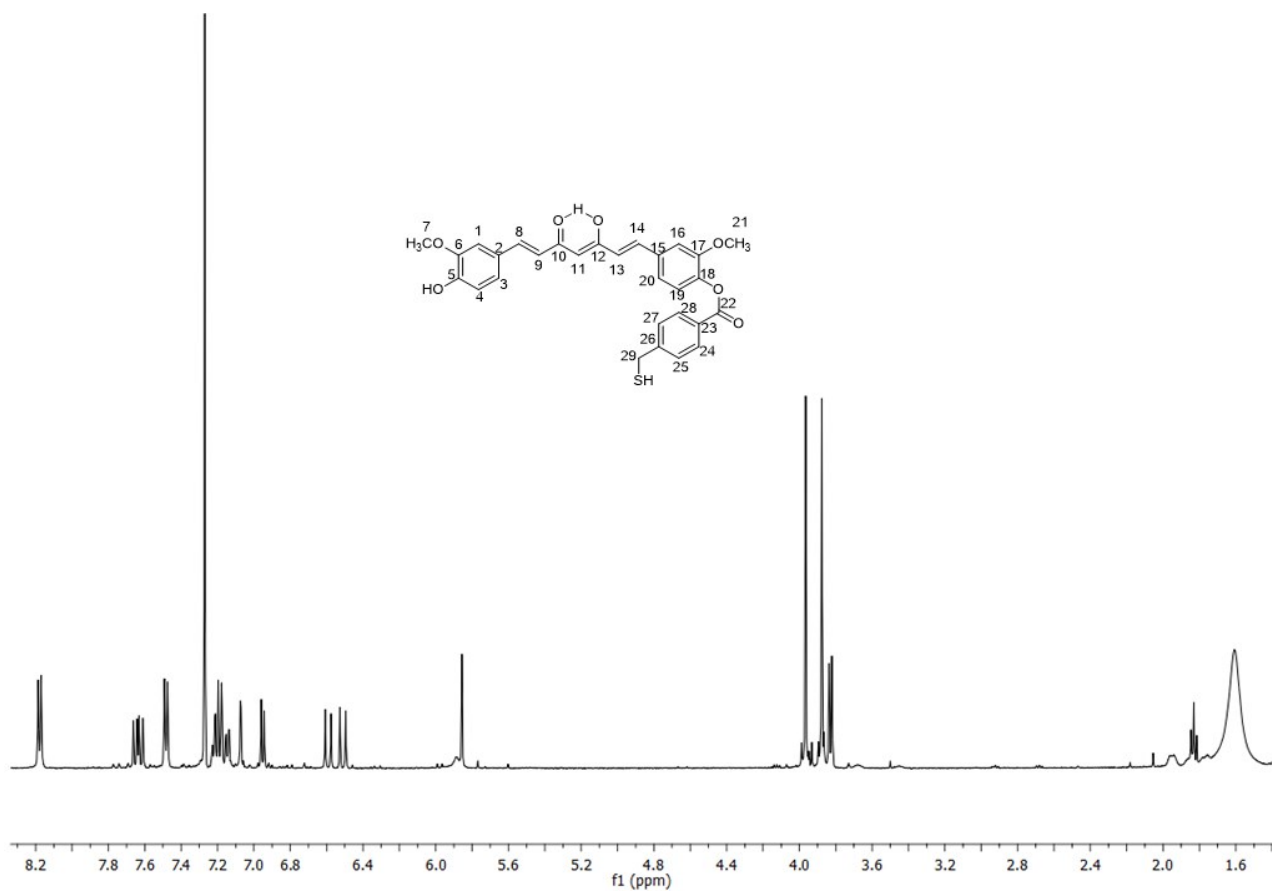

Figure S5. <sup>1</sup>H NMR spectrum of compound 6 (500 MHz, CDCl<sub>3</sub>, 25 °C)

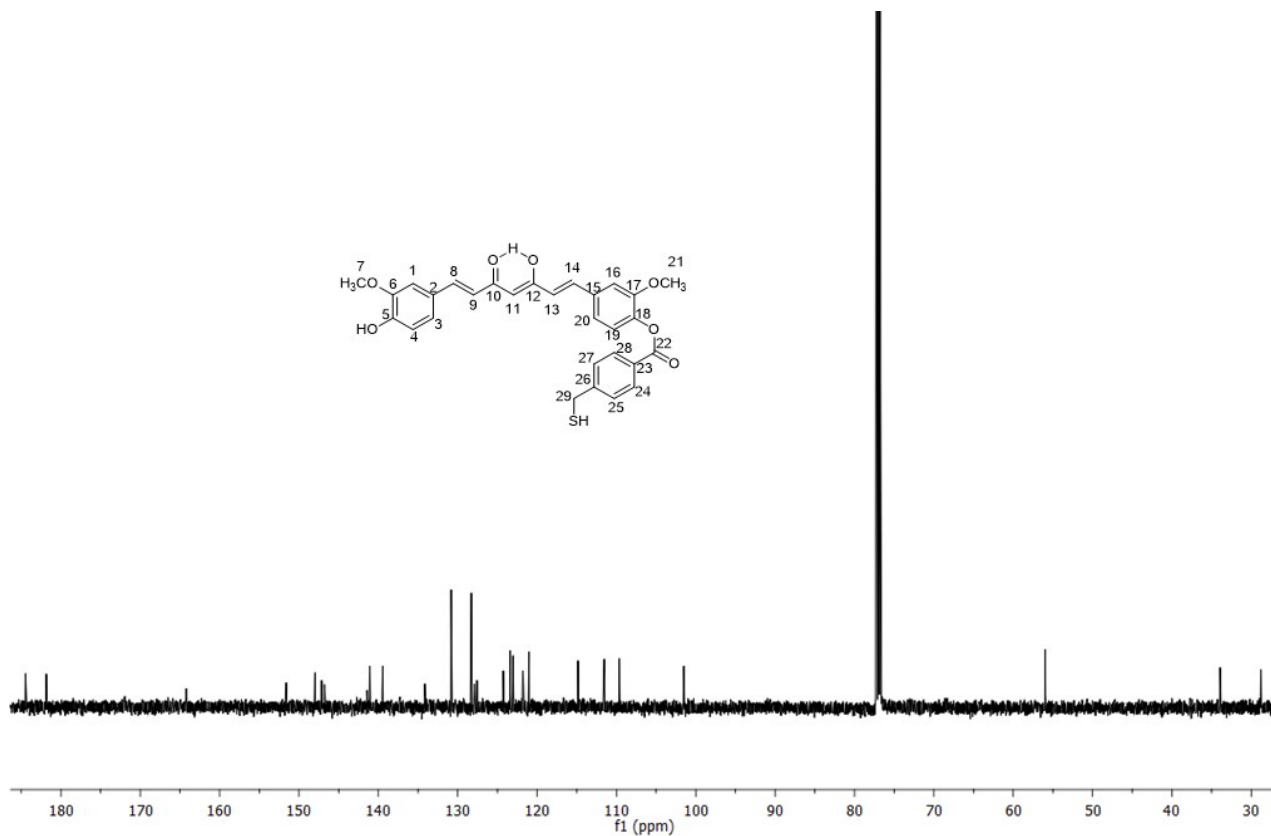

Figure S6. <sup>13</sup>C NMR spectrum of compound 6 (500 MHz, CDCl<sub>3</sub>, 25 °C)

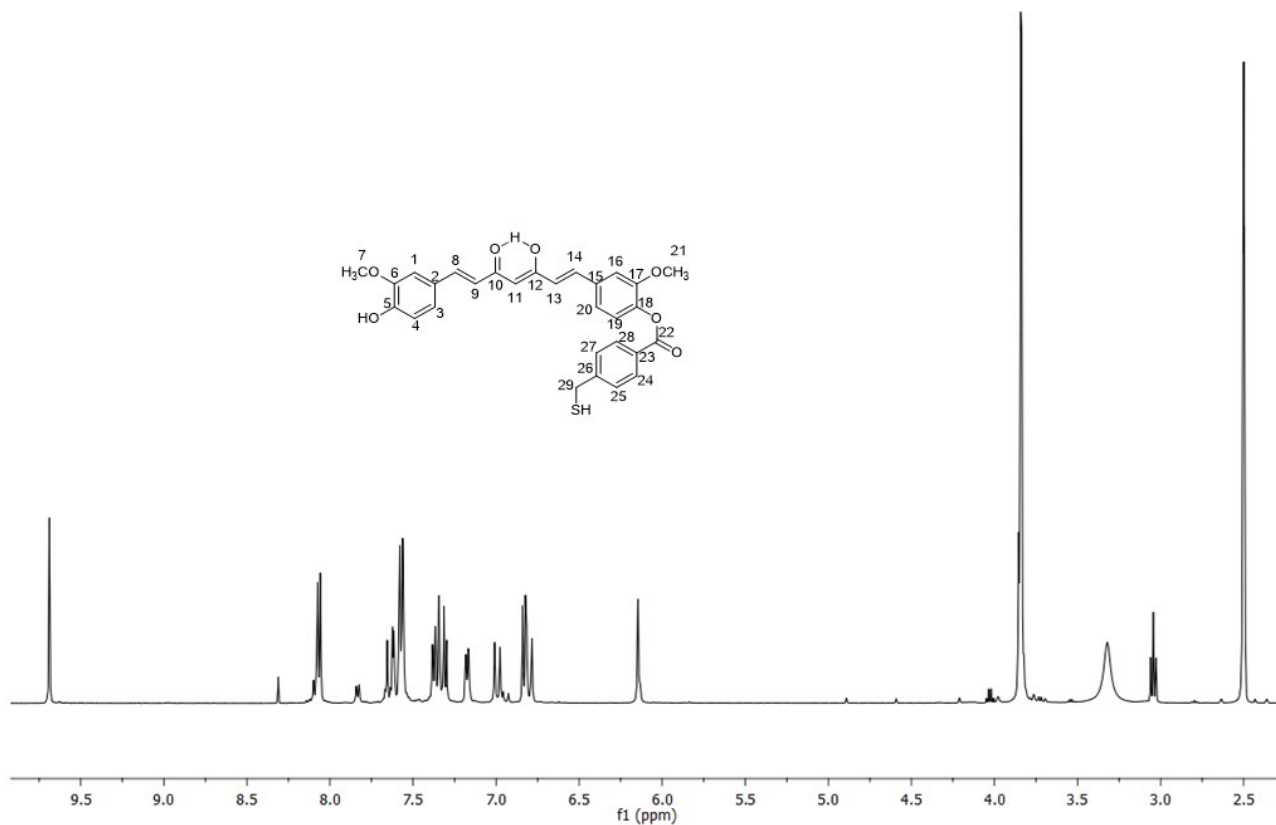

Figure S7. <sup>1</sup>H NMR spectrum of compound 6 (500 MHz, DMSO-*d*<sub>6</sub>, 25 °C)

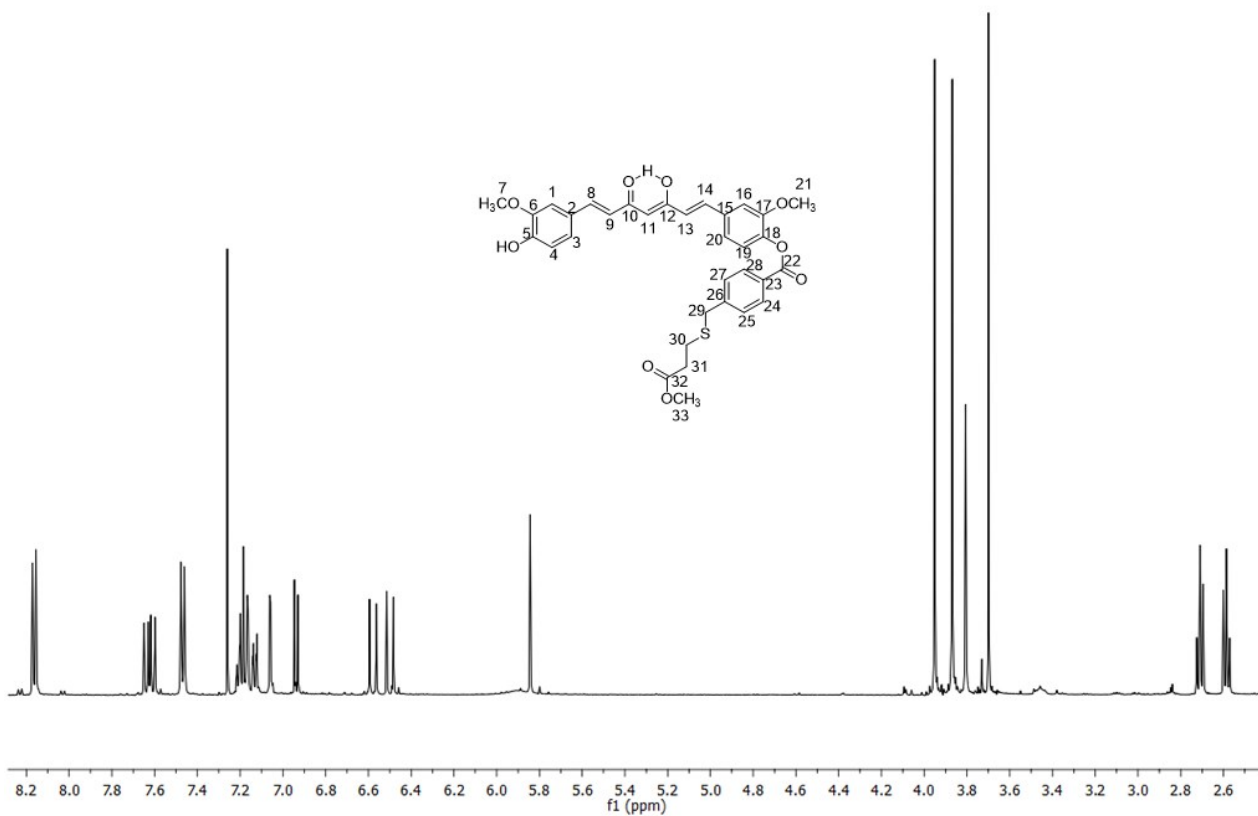

Figure S8.  $^1\text{H}$  NMR spectrum of compound 7 (500 MHz,  $\text{CDCl}_3$ , 25 °C)

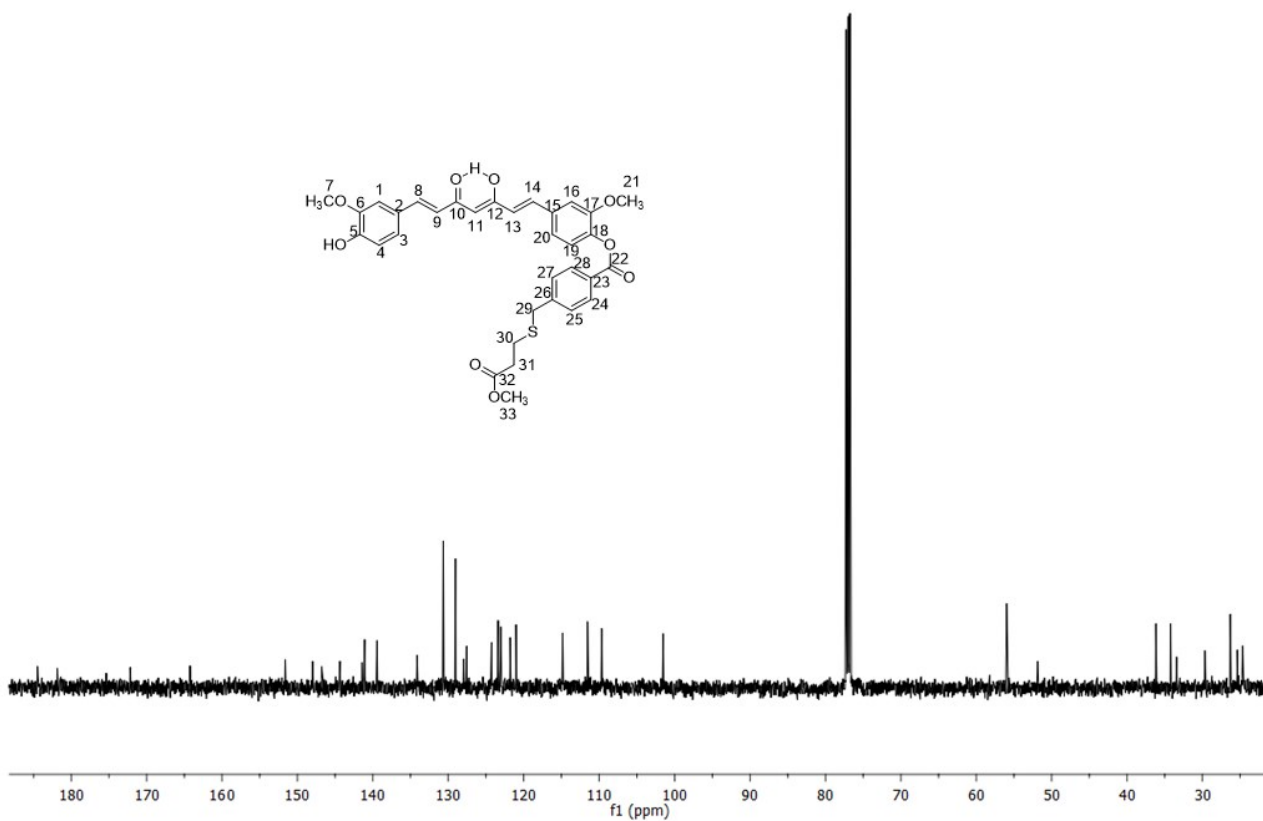

Figure S9.  $^{13}\text{C}$  NMR spectrum of compound 7 (500 MHz,  $\text{CDCl}_3$ , 25 °C)

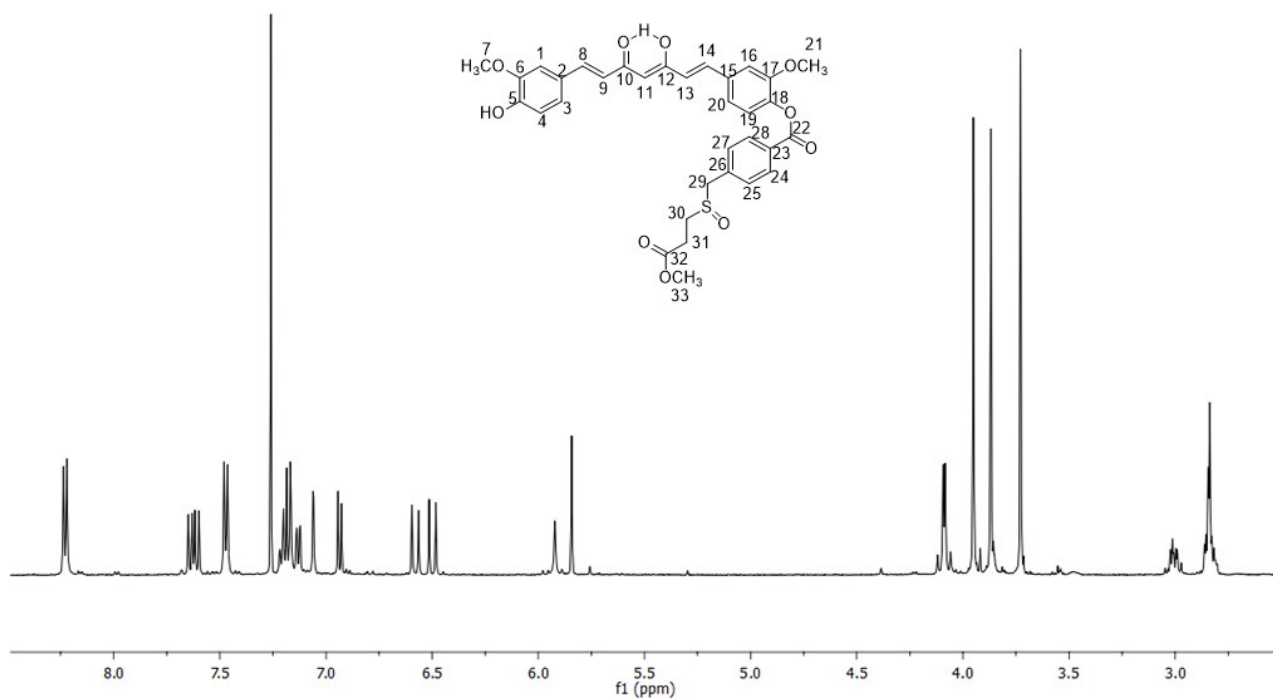

Figure S10. <sup>1</sup>H NMR spectrum of compound 8 (500 MHz, CDCl<sub>3</sub>, 25 °C)

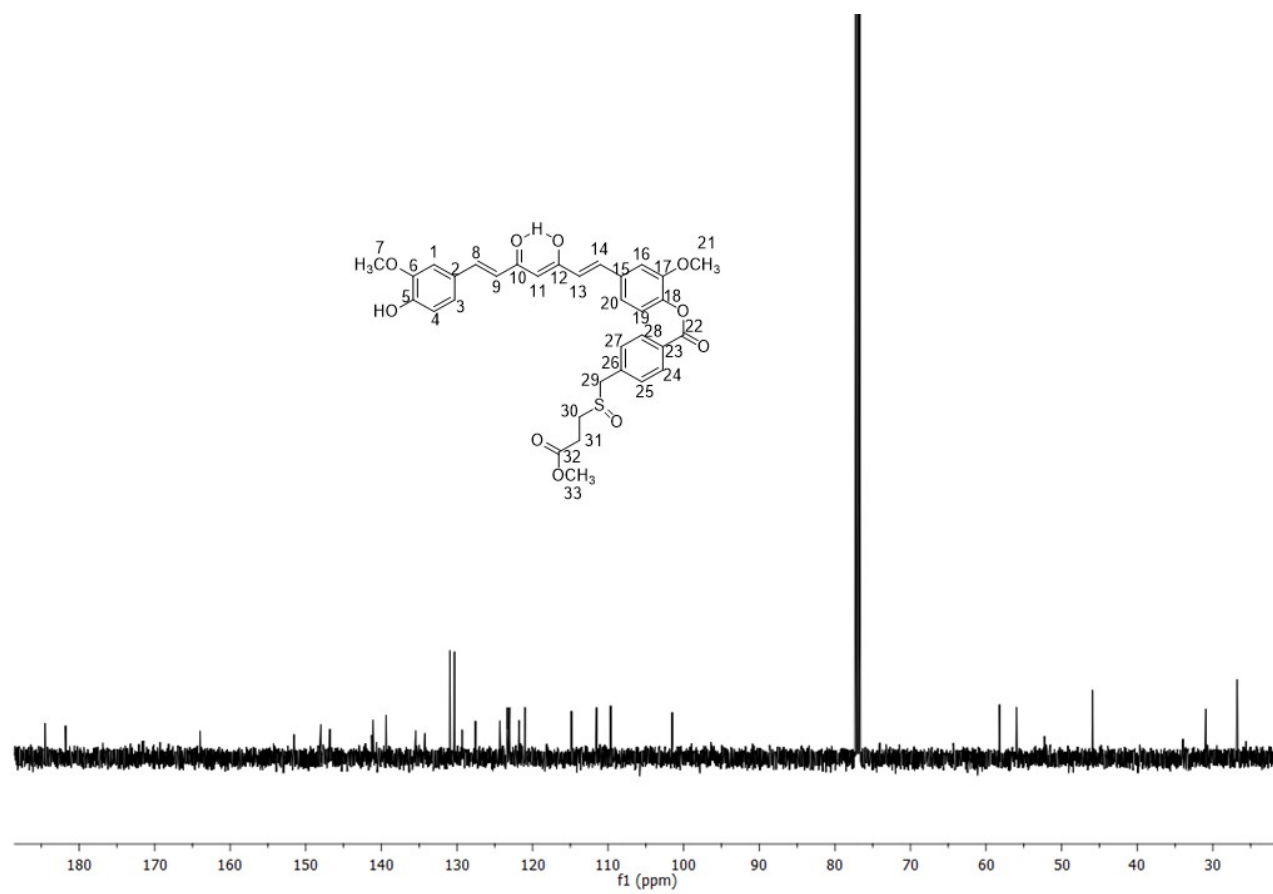

Figure S11. <sup>13</sup>C NMR spectrum of compound 8 (500 MHz, CDCl<sub>3</sub>, 25 °C)

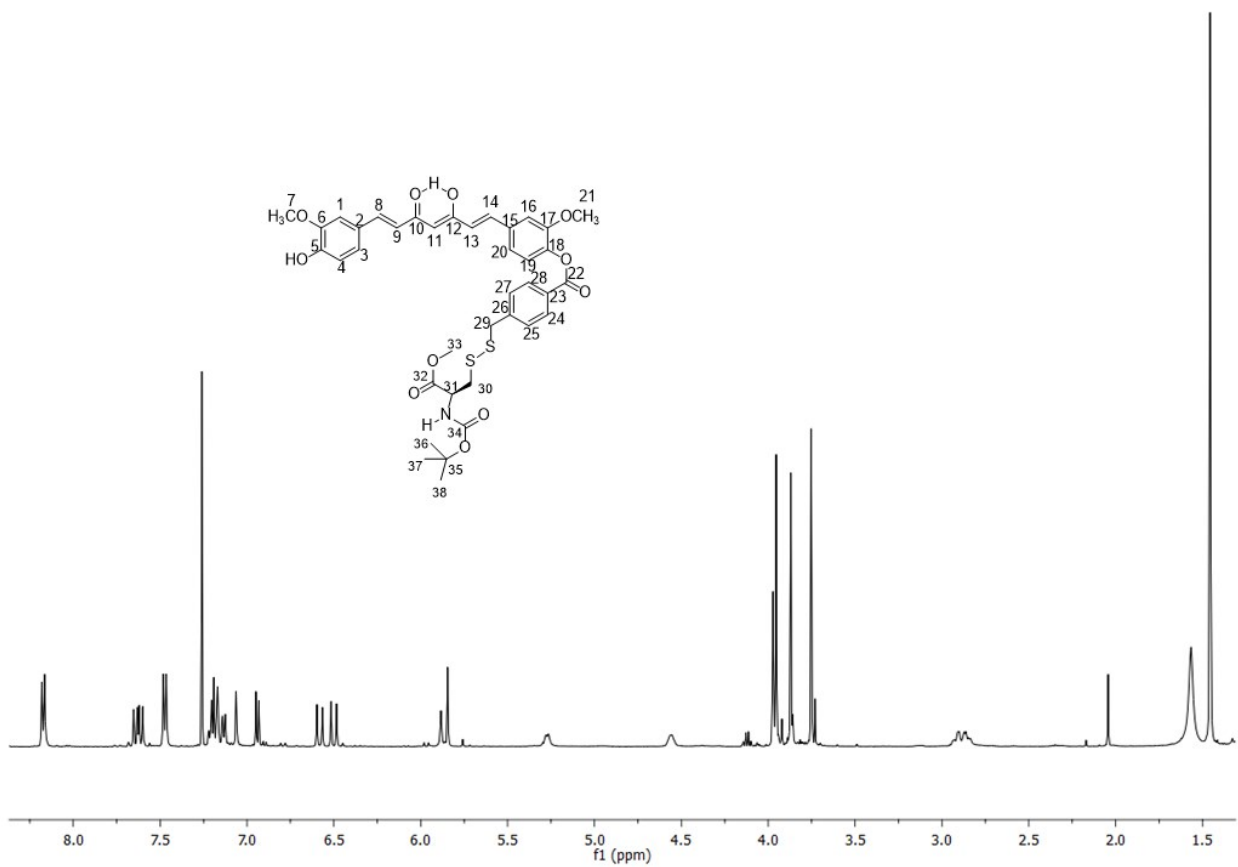

Figure S12.  $^1\text{H}$  NMR spectrum of compound 10 (500 MHz,  $\text{CDCl}_3$ , 25 °C)

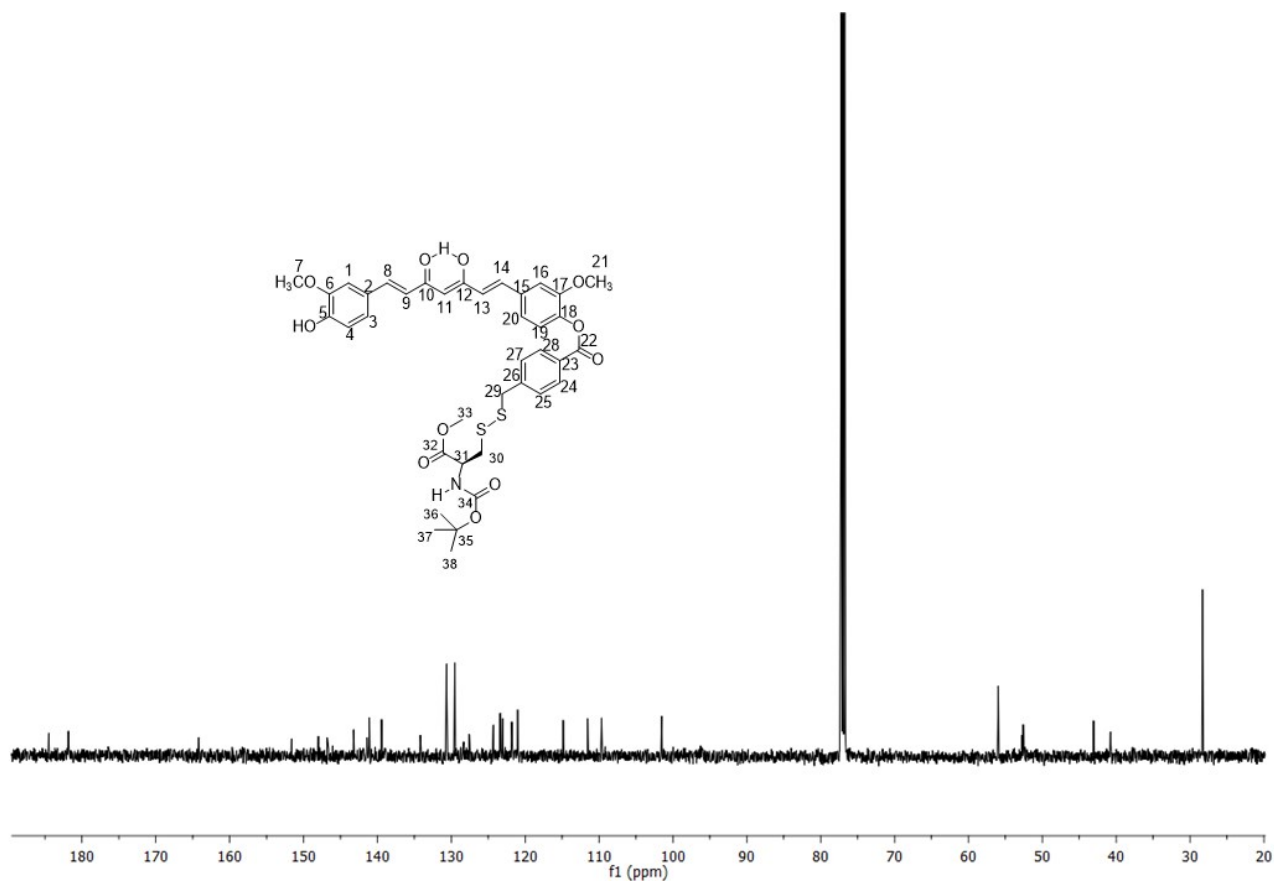

Figure S13.  $^{13}\text{C}$  NMR spectrum of compound 10 (500 MHz,  $\text{CDCl}_3$ , 25 °C)



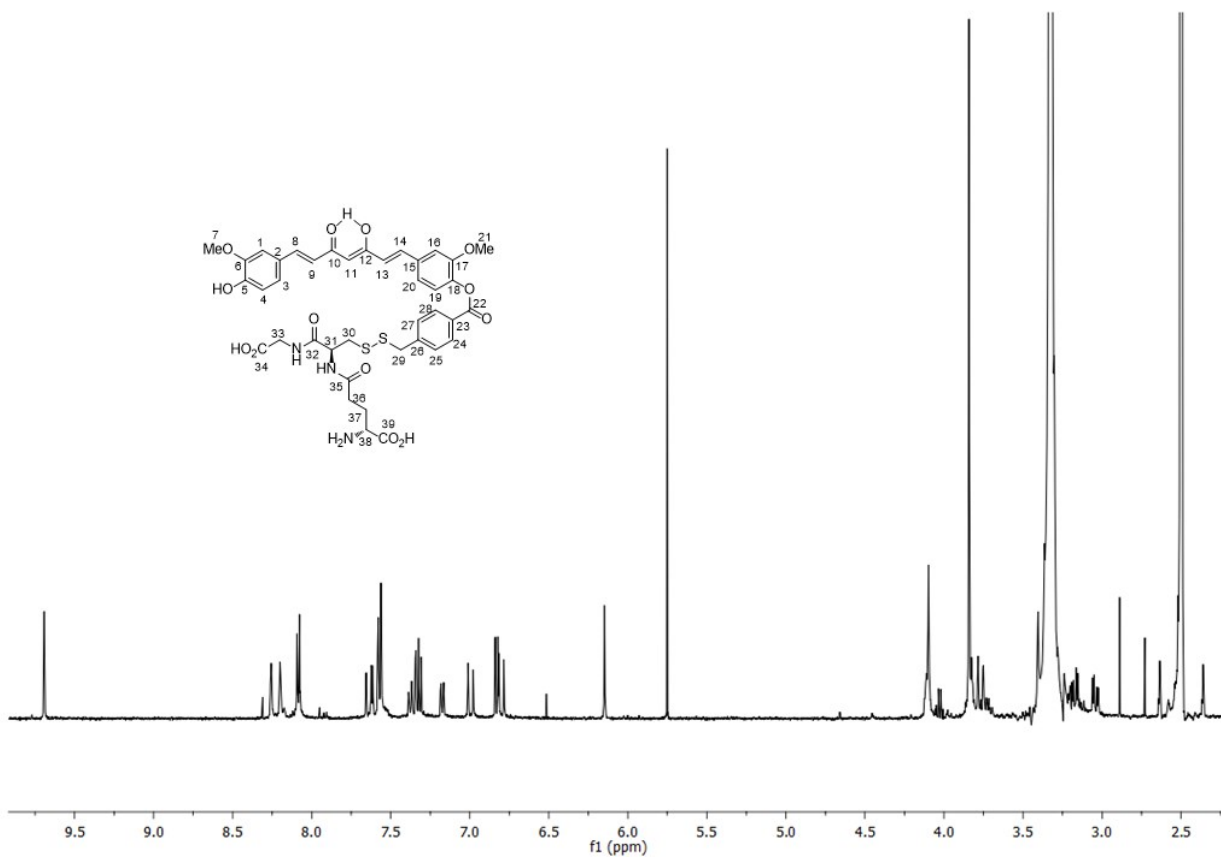

Figure S14. <sup>1</sup>H NMR spectrum of compound 11 (500 MHz, DMSO-d<sub>6</sub>, 25 °C)
